# Supplementary material
Source: PubMed Central journal article supplement (PMC9169697)
Supplement: NIHMS1802835-supplement-supple_figs_table.pdf [file NIHMS1802835-supplement-supple_figs_table.pdf]

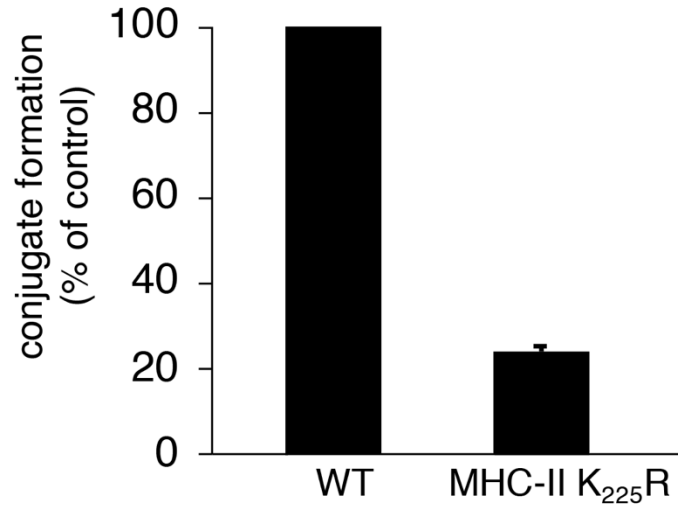

## Supp. Figure 1

### **Supplemental Fig. 1. MHC-II ubiquitination mutant DCs make inefficient conjugates with CD4 T cells.**

Purified spleen DCs isolated from WT and MHC-II K<sub>225</sub>R mutant mice DCs were pulsed with 20 µg/ml OVA protein for 3 hr, washed, and cultured with OT-II CD4<sup>+</sup> T cells for 30 min. Conjugates were fixed and stained with APC-CD3 mAb and e450-MHC-II mAb for analysis by confocal immunofluorescence microscopy. Conjugates was scored by a blinded observer, and the percentage of cells with significant amounts of conjugates was calculated.

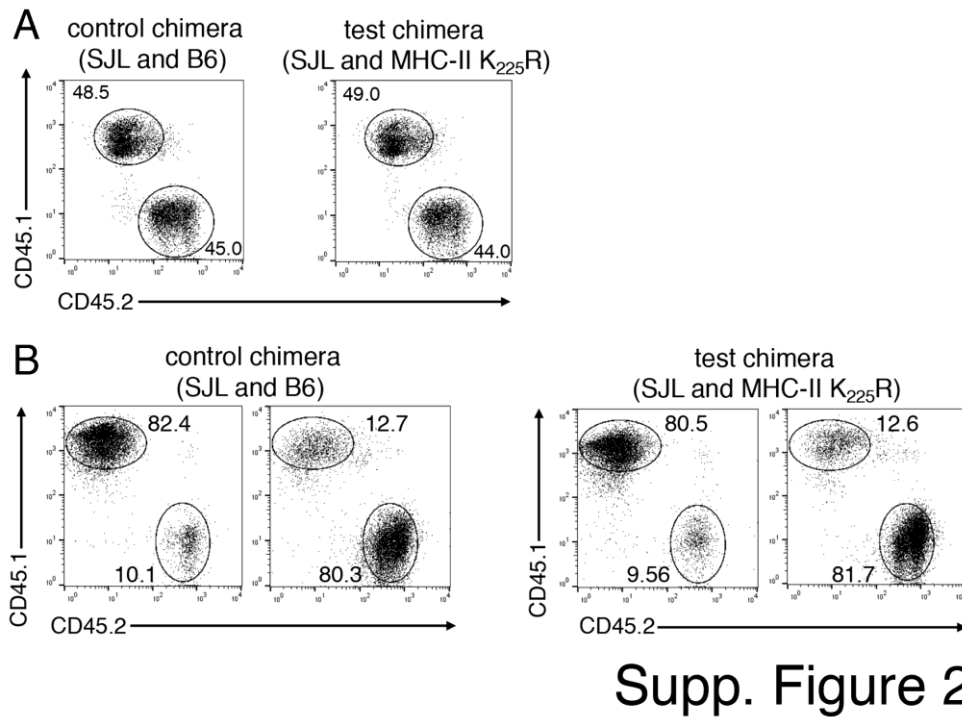

**Supplemental Fig. 2. Analysis of mixed bone marrow chimeric mice.**

(A) Mixed BM chimeric mice were generated by reconstitution of irradiated CD45.1<sup>+</sup> mice with a 1:1 mixture of BM cells from CD45.1<sup>+</sup> B6.SJL mice and BM cells from either CD45.2<sup>+</sup> WT or MHC-II K<sub>225</sub>R ubiquitination mutant donors. The chimerism from chimera 1 (SJL:B6) or chimera 2 (SJL:MHC-II K<sub>225</sub>R) was determined 8-12 weeks post reconstitution by FACS analysis. (B) Purified spleen DCs from chimeric mice were subjected to additional separation into CD45.2<sup>+</sup> DCs (using anti-CD45.2 microbeads; Miltenyi Biotech) and CD45.1<sup>+</sup> DCs (the flow-through from the anti-CD45.2 microbead column). Representative FACS experiment of total spleen cells, gated on CD11c<sup>Hi</sup> cells, examining DC chimerism and purity (based on CD45.1 and CD45.2 expression).

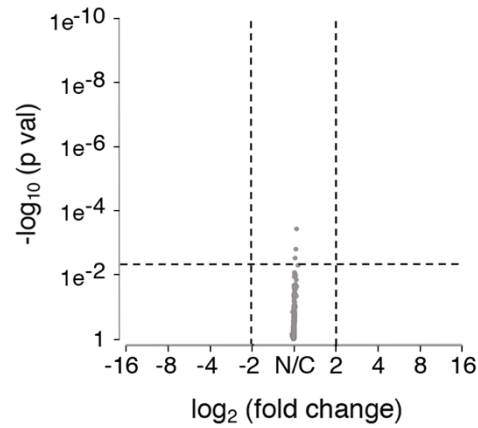

## Supp. Figure 3

### **Supplemental Fig. 3. Maturation reverses the gene expression differences between MHC-II K<sub>225</sub>R and wild-type DCs.**

Volcano plot showing the differentially expressed genes from activated cDCs (both CD8<sup>-</sup> and CD8<sup>+</sup> cDCs) isolated from spleens of WT and MHC-II K<sub>225</sub>R mutant mice. The DCs were activated by culture with LPS for 16 hr prior to scRNA-Seq analysis. Gray dots indicate non-significant genes. X and Y axes show log<sub>2</sub> fold change and  $-\log_{10}$  p-value, respectively. Thresholds are shown as dashed lines.

Supplemental Table 1. PANTHER analysis of gene expression differences between MHC-II K<sub>225</sub>R and wild-type DCs

|                                                                                 |                                                                      |                    |                   |                     |                          |                      |              |
|---------------------------------------------------------------------------------|----------------------------------------------------------------------|--------------------|-------------------|---------------------|--------------------------|----------------------|--------------|
| Analysis Type:                                                                  | PANTHER Overrepresentation Test (Released 20200728)                  |                    |                   |                     |                          |                      |              |
| Annotation Version and Release Date:                                            | GO Ontology database DOI: 10.5281/zenodo.4033054 Released 2020-09-10 |                    |                   |                     |                          |                      |              |
| Analyzed List:                                                                  | Client Text Box Input (Mus musculus)                                 |                    |                   |                     |                          |                      |              |
| Reference List:                                                                 | Mus musculus (all genes in database)                                 |                    |                   |                     |                          |                      |              |
| Test Type:                                                                      | FISHER                                                               |                    |                   |                     |                          |                      |              |
| Correction:                                                                     | FDR                                                                  |                    |                   |                     |                          |                      |              |
| <b>GO biological process complete</b>                                           | <b>Mus musculus - REFLIST (22265)</b>                                | <b>Input (159)</b> | <b>(expected)</b> | <b>(over/under)</b> | <b>(fold Enrichment)</b> | <b>(raw P-value)</b> | <b>(FDR)</b> |
| immune system process (GO:0002376)                                              | 2430                                                                 | 43                 | 17.35             | +                   | 2.48                     | 2.40E-08             | 3.79E-04     |
| immune response (GO:0006955)                                                    | 1533                                                                 | 30                 | 10.95             | +                   | 2.74                     | 5.07E-07             | 4.01E-03     |
| regulation of immune system process (GO:0002682)                                | 1515                                                                 | 29                 | 10.82             | +                   | 2.68                     | 1.26E-06             | 4.98E-03     |
| leukocyte differentiation (GO:0002521)                                          | 384                                                                  | 14                 | 2.74              | +                   | 5.11                     | 1.00E-06             | 5.28E-03     |
| cell activation (GO:0001775)                                                    | 624                                                                  | 17                 | 4.46              | +                   | 3.81                     | 3.27E-06             | 7.39E-03     |
| leukocyte activation (GO:0045321)                                               | 541                                                                  | 16                 | 3.86              | +                   | 4.14                     | 2.35E-06             | 7.43E-03     |
| regulation of response to external stimulus (GO:0032101)                        | 912                                                                  | 21                 | 6.51              | +                   | 3.22                     | 2.91E-06             | 7.66E-03     |
| lymphocyte activation (GO:0046649)                                              | 436                                                                  | 14                 | 3.11              | +                   | 4.5                      | 4.18E-06             | 8.27E-03     |
| hemopoiesis (GO:0030097)                                                        | 674                                                                  | 17                 | 4.81              | +                   | 3.53                     | 8.79E-06             | 1.39E-02     |
| lymphocyte differentiation (GO:0030098)                                         | 284                                                                  | 11                 | 2.03              | +                   | 5.42                     | 8.74E-06             | 1.54E-02     |
| antigen receptor-mediated signaling pathway (GO:0050851)                        | 307                                                                  | 11                 | 2.19              | +                   | 5.02                     | 1.76E-05             | 2.53E-02     |
| hematopoietic or lymphoid organ development (GO:0048534)                        | 732                                                                  | 17                 | 5.23              | +                   | 3.25                     | 2.47E-05             | 3.25E-02     |
| response to external stimulus (GO:0009605)                                      | 2360                                                                 | 35                 | 16.85             | +                   | 2.08                     | 2.74E-05             | 3.33E-02     |
| immune response-activating signal transduction (GO:0002757)                     | 332                                                                  | 11                 | 2.37              | +                   | 4.64                     | 3.53E-05             | 3.72E-02     |
| immune response-activating cell surface receptor signaling pathway (GO:0002429) | 331                                                                  | 11                 | 2.36              | +                   | 4.65                     | 3.43E-05             | 3.88E-02     |
| immune response-regulating cell surface receptor signaling pathway (GO:0002768) | 343                                                                  | 11                 | 2.45              | +                   | 4.49                     | 4.69E-05             | 4.12E-02     |
| immune response-regulating signaling pathway (GO:0002764)                       | 346                                                                  | 11                 | 2.47              | +                   | 4.45                     | 5.06E-05             | 4.21E-02     |
| negative regulation of cell population proliferation (GO:0008285)               | 692                                                                  | 16                 | 4.94              | +                   | 3.24                     | 4.56E-05             | 4.24E-02     |
| immune system development (GO:0002520)                                          | 768                                                                  | 17                 | 5.48              | +                   | 3.1                      | 4.44E-05             | 4.39E-02     |

**Supplemental Table 1. PANTHER analysis of gene expression differences between MHC-II K<sub>225</sub>R and wild-type DCs.**

Overrepresentation Analysis with PANTHER. The results from PANTHER show the number of pathway related genes in the mouse genome, the number of pathway genes found in the differentially regulated subset, the expected number of pathway genes in the subset, fold change of discovered genes over expected genes, and the raw and adjusted p-values (i.e. FDR).
